# Supplementary material for: Behavioral and Disease-Related Characteristics of Patients with Acute Stroke during the Coronavirus Disease Pandemic
Source: MDPI journal article supplement (doi:10.3390/healthcare10040604), 2022-03-23
Supplement: s1 [file s1]

**Table S1.** Features of ischemic stroke cases recorded during Period 1.

|                                | <b>Pre-COVID-19</b><br><b>(<i>n</i> = 88)</b> | <b>COVID-19</b><br><b>(<i>n</i> = 74)</b> | <b><i>p</i>-Value</b> |
|--------------------------------|-----------------------------------------------|-------------------------------------------|-----------------------|
| Subtype, <i>n</i> (%)          |                                               |                                           | 0.085                 |
| LAA                            | 42 (47.7)                                     | 34 (45.9)                                 |                       |
| SVO                            | 34 (38.6)                                     | 20 (27.0)                                 |                       |
| CE                             | 6 (6.8)                                       | 15 (20.3)                                 |                       |
| Other determined               | 1 (1.1)                                       | 0 (0.0)                                   |                       |
| Undetermined                   | 5 (5.7)                                       | 5 (6.8)                                   |                       |
| Acute treatments, <i>n</i> (%) |                                               |                                           | 0.369                 |
| None                           | 73 (83.0)                                     | 64 (86.5)                                 |                       |
| IV                             | 1 (1.1)                                       | 2 (2.7)                                   |                       |
| IA                             | 11 (12.5)                                     | 4 (5.4)                                   |                       |
| IV and IA                      | 3 (3.4)                                       | 4 (5.4)                                   |                       |

**Abbreviations:** COVID-19, coronavirus disease; LAA, large-artery atherosclerosis; SVO, small-vessel occlusion; CE, cardio-embolism; IV, intravenous; IA, intraarterial.
